# Supplementary material for: The P2 nucleic acid binding protein of Sugarcane bacilliform virus is a viral pathogenic factor
Source: PeerJ. 2024 Feb 20;12:e16982. doi: 10.7717/peerj.16982 (PMC10885806; doi:10.7717/peerj.16982)
Supplement: Supplemental Information 17 [file peerj-12-16982-s017.xls]

## Sheet: Sheet1
ITEM TO CHECK	IMPORTANCE	CHECKLIST
EXPERIMENTAL DESIGN
Definition of experimental and control groups	E	Line 160-162
Number within each group	E	Line 170-174. At least 3 independent biological and experimental replicates were conducted
Assay carried out by core lab or investigator's lab?	D	The similar assay was carried out by Xueping Zhou's lab
Acknowledgement of authors' contributions	D	Line 403-407,line 423-430
SAMPLE
Description	E	Line 160-162
Volume/mass of sample processed	D	Line 164-169. 0.1g Nicotiana bethamiana leaf tissue was used to extract total RNA.2ug mRNA/20 ul reaction volume
Microdissection or macrodissection	E	Not performed
Processing procedure	E	Not described
If frozen - how and how quickly?	E	The samples were weighed and quickly frozen in liquid nitrogen
If fixed - with what, how quickly?	E	Not performed
Sample storage conditions and duration (especially for FFPE samples)	E	The samples were stored at -80℃ in an Ultra-low temperature freezer till use.
NUCLEIC ACID EXTRACTION
Procedure and/or instrumentation	E	Line 160-164.The samples were ground to powder in a freezing grinder and the RNA was extracted by using a kit in a refrigerated centrifuge.
Name of kit and details of any modifications	E	Line 160-164.The RNAiso Plus reagent (Cat#: 9108, Takara, Beijing, China) was used according to the manufacter's introductions.
Source of additional reagents used	D	None
Details of DNase or RNAse treatment	E	Line 164-166.The genomic DNA was digested by using the DNase supplied in the HiScript III 1st Strand cDNA Synthesis Kit (+gDNA wiper) (Cat#: R312-01, Vazyme, Nanjing, China) according to the manufacturer’s instructions.
Contamination assessment (DNA or RNA)	E	As shown in line 160-164
Nucleic acid quantification	E	As shown in line 160-164
Instrument and method	E	As shown in line 160-164
Purity (A260/A280)	D	As shown in line 160-164
Yield	D	As shown in line 160-164
RNA integrity method/instrument	E	As shown in line 160-164
RIN/RQI or Cq of 3' and 5' transcripts	E	Not performed
Electrophoresis traces	D	The maniscrpt not displayed
Inhibition testing (Cq dilutions, spike or other)	E	Not performed
REVERSE TRANSCRIPTION
Complete reaction conditions	E	Line 164-166.The revese transcription assay was performed by using the HiScript III 1st Strand cDNA Synthesis Kit (+gDNA wiper) (Cat#: R312-01, Vazyme, Nanjing, China) according to the manufacturer’s instructions.
Amount of RNA and reaction volume	E	Line 164-166.2 ug of RNA was used in a recommended 20 ul reaction volume.
Priming oligonucleotide (if using GSP) and concentration	E	Oligo(dT)20VN primer was used, and the concentration is 50 uM.
Reverse transcriptase and concentration	E	Line 164-166.The revese transcription assay was performed by using the HiScript III 1st Strand cDNA Synthesis Kit (+gDNA wiper) (Cat#: R312-01, Vazyme, Nanjing, China) according to the manufacturer’s instructions.
Temperature and time	E	Line 164-166.The revese transcription assay was performed by using the HiScript III 1st Strand cDNA Synthesis Kit (+gDNA wiper) (Cat#: R312-01, Vazyme, Nanjing, China) according to the manufacturer’s instructions.
Manufacturer of reagents and catalogue numbers	D	Cat#: R312-01, Vazyme, Nanjing, China
Cqs with and without RT	D*	Not performed
Storage conditions of cDNA	D	The cDNA products were stored at -80℃。
qPCR TARGET INFORMATION
If multiplex, efficiency and LOD of each assay.	E	Not performed
Sequence accession number	E	The GenBank accession numbers of genes analyzed in this study are shown in Figure 4 legend as follows: NbMET1 (FJ222441), NbDRM2 (JQ957857), NbCMT3 (JQ957858), NbROS1 (JQ957859), NbROS2 (JQ957860), NbDCL3 (FM986782), NbAGO1 (DQ321488) , NbAGO4(DQ321490) and NbHDA6(KU170188).
Location of amplicon	D	The 5'-terminal of the taget genes
Amplicon length	E	The average length of the amplicons is 200 bp.
In silico specificity screen (BLAST, etc)	E	Not performed
Pseudogenes, retropseudogenes or other homologs?	D	Not performed
Sequence alignment	D	Not performed
Secondary structure analysis of amplicon	D	Not performed
Location of each primer by exon or intron (if applicable)	E	Not offered
What splice variants are targeted?	E	Not performed
qPCR OLIGONUCLEOTIDES
Primer sequences	E	All the primers used in the study were listed in TABLE S1.
RTPrimerDB Identification Number	D	Not performed
Probe sequences	D**	Not offered
Location and identity of any modifications	E	Not performed
Manufacturer of oligonucleotides	D	All the primers used in the study were synthesized by Sangon Biotech.
Purification method	D	HPLC
qPCR PROTOCOL
Complete reaction conditions	E	As described in line 166-174
Reaction volume and amount of cDNA/DNA	E	As described in line 166-174
Primer, (probe), Mg++ and dNTP concentrations	E	As described in line 166-174
Polymerase identity and concentration	E	As described in line 166-174
Buffer/kit identity and manufacturer	E	2 × ChamQ Universal SYBR qPCR Master Mix (Cat#: Q711-02, Vazyme, Nanjing, China)
Exact chemical constitution of the buffer	D	The 2 × ChamQ Universal SYBR qPCR Master Mix contains dNTP，Mg2+，Champagne Taq DNA Polymerase，SYBR Green I，Specific ROX Reference Dye
Additives (SYBR Green I, DMSO, etc.)	E	SYBR Green I
Manufacturer of plates/tubes and catalog number	D	Sangon Biotech (BBI)/Order NO. F603105
Complete thermocycling parameters	E	As described in line 170-174
Reaction setup (manual/robotic)	D	As described in line 166-174
Manufacturer of qPCR instrument	E	LightCycler 96 real-time PCR system (F. Hoffmann-La Roche Ltd. Switzerland)
qPCR VALIDATION
Evidence of optimisation (from gradients)	D	Not offered
Specificity (gel, sequence, melt, or digest)	E	Not offered
For SYBR Green I, Cq of the NTC	E	As supplied in the supplimentary materials
Standard curves with slope and y-intercept	E	As supplied in the supplimentary materials
PCR efficiency calculated from slope	E	As supplied in the supplimentary materials
Confidence interval for PCR efficiency or standard error	D	Not offered
r2 of standard curve	E	Not offered
Linear dynamic range	E	Not offered
Cq variation at lower limit	E	As supplied in the supplimentary materials
Confidence intervals throughout range	D	As supplied in the supplimentary materials
Evidence for limit of detection	E	As supplied in the supplimentary materials
If multiplex, efficiency and LOD of each assay.	E	Not offered
DATA ANALYSIS
qPCR analysis program (source, version)	E	The data was analysed by using the LightCycler® 96 SW 1.1 softeware.
Cq method determination	E	The Cq value was determined by using the LightCycler® 96 SW 1.1 softeware.
Outlier identification and disposition	E	The results were determined by using the LightCycler® 96 SW 1.1 softeware.
Results of NTCs	E	As supplied in the supplimentary materials
Justification of number and choice of reference genes	E	The β-actin gene was used as the reference gene refered to Xueping Zhou's research
Description of normalisation method	E	As described in line 174-175
Number and concordance of biological replicates	D	Three independent biological and experimental replicates were performed as described in line 170-174 and shown in the supplimentary materials
Number and stage (RT or qPCR) of technical replicates	E	Three independent biological and experimental replicates were performed as described in line 170-174 and shown in the supplimentary materials
Repeatability (intra-assay variation)	E	As shown in the supplimentary materials
Reproducibility (inter-assay variation, %CV)	D	Not offered
Power analysis	D	Not offered
Statistical methods for result significance	E	T-test
Software (source, version)	E	EXCEL 2019
Cq or raw data submission using RDML	D	The raw data was submitted as supplimentary materials
Table 1. MIQE checklist for authors, reviewers and editors. All essential information (E) must be submitted with the manuscript. Desirable
information (D) should be submitted if available. If using primers obtained from RTPrimerDB, information on qPCR target, oligonucleotides,
protocols and validation is available from that source.
*: Assessing the absence of DNA using a no RT assay is essential when first extracting RNA. Once the sample has been validated as
RDNA-free, inclusion of a no-RT control is desirable, but no longer essential.
**: Disclosure of the probe sequence is highly desirable and strongly encouraged. However, since not all commercial pre-designed assay
vendors provide this information, it cannot be an essential requirement. Use of such assays is advised against.
