# Supplementary figures and images for: The P2 nucleic acid binding protein of Sugarcane bacilliform virus is a viral pathogenic factor
Source: PeerJ journal article supplement (doi:10.7717/peerj.16982), 2024-02-20

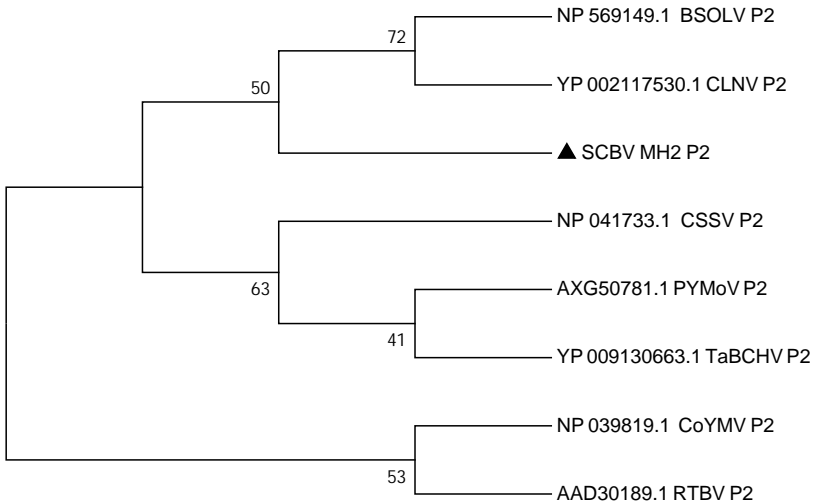

Supplement: Fig1RawData.zip [file Fig1RawData.zip]
